# Supplementary material
Source: publisher figshare collection journal article supplement (https://acs.figshare.com/ndownloader/files/4597558)

**Supporting Information**  
**for**  
**Layer-by-Layer Assembled Multilayer Films of Polyelectrolyte-Stabilized**  
**Surfactant Micelles for the Incorporation of Non-Charged Organic Dyes**

Xiaokong Liu, Lu Zhou, Wei Geng and Junqi Sun\*

State Key Laboratory of Supramolecular Structure and Materials, College of  
Chemistry, Jilin University, Changchun, P. R. China 130012

E-mail: sun\_junqi@jlu.edu.cn

Figure S1. The un-modified UV-vis absorption spectra of [PAA&(Py@CTAB)/PDDA]\**n* films with *n* ranging from 1 to 8.

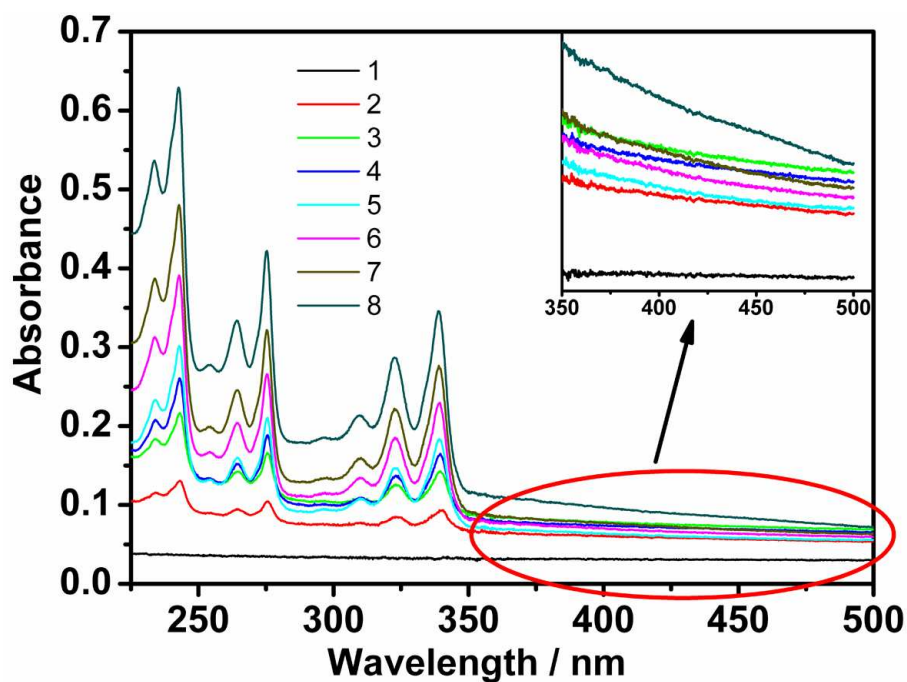

Figure S2. The UV-vis absorption spectra of LbL deposited films of CTAB micelles/poly(sodium 4-styrenesulfonate) (PSS). Black curve represents the absorption spectrum of the (PDDA/PSS)\*2 precursor film. Red, green and blue curves are the absorption spectra of CTAB micelles/PSS films with a deposition cycles of 1, 2 and 3, respectively. Obviously, the construction of CTAB micelles/PSS films was unsuccessful.

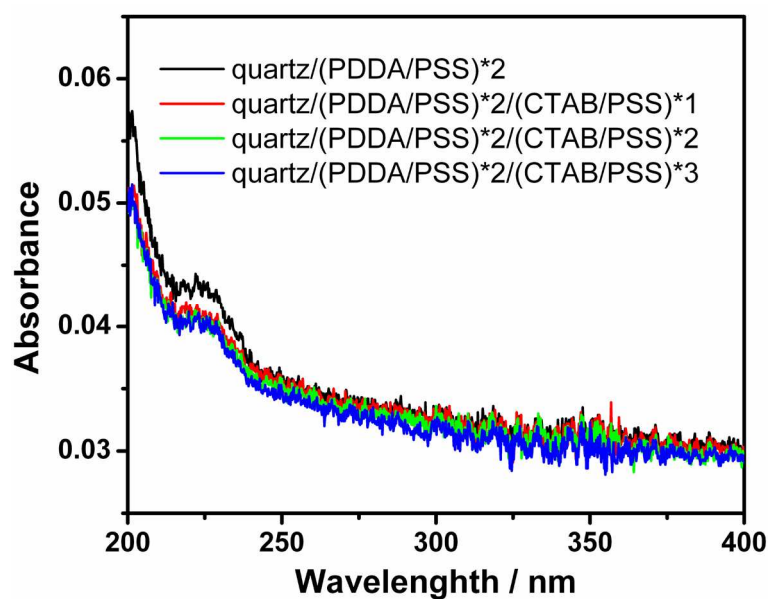

Supplement: Supplementary file 1 [file 4597558]
